# Supplementary material for: Entrapped polyamines in biomimetically synthesized nanostructured silica spheres as pH-responsive gates for controlled drug release
Source: Royal Society of Chemistry journal article supplement (doi:10.1039/c2jm32898d), 2012-01-01
Supplement: c2jm32898d.pdf [file c2jm32898d.pdf]

## Entrapped Polyamines in Biomimetically Synthesized Nanostructured Silica spheres as pH-responsive Gates for Controlled Drug Release

Gousia Begum,<sup>a</sup> M. Vijaya Laxmi<sup>a</sup> and Rohit Kumar Rana\*<sup>a</sup>

### Supporting Information

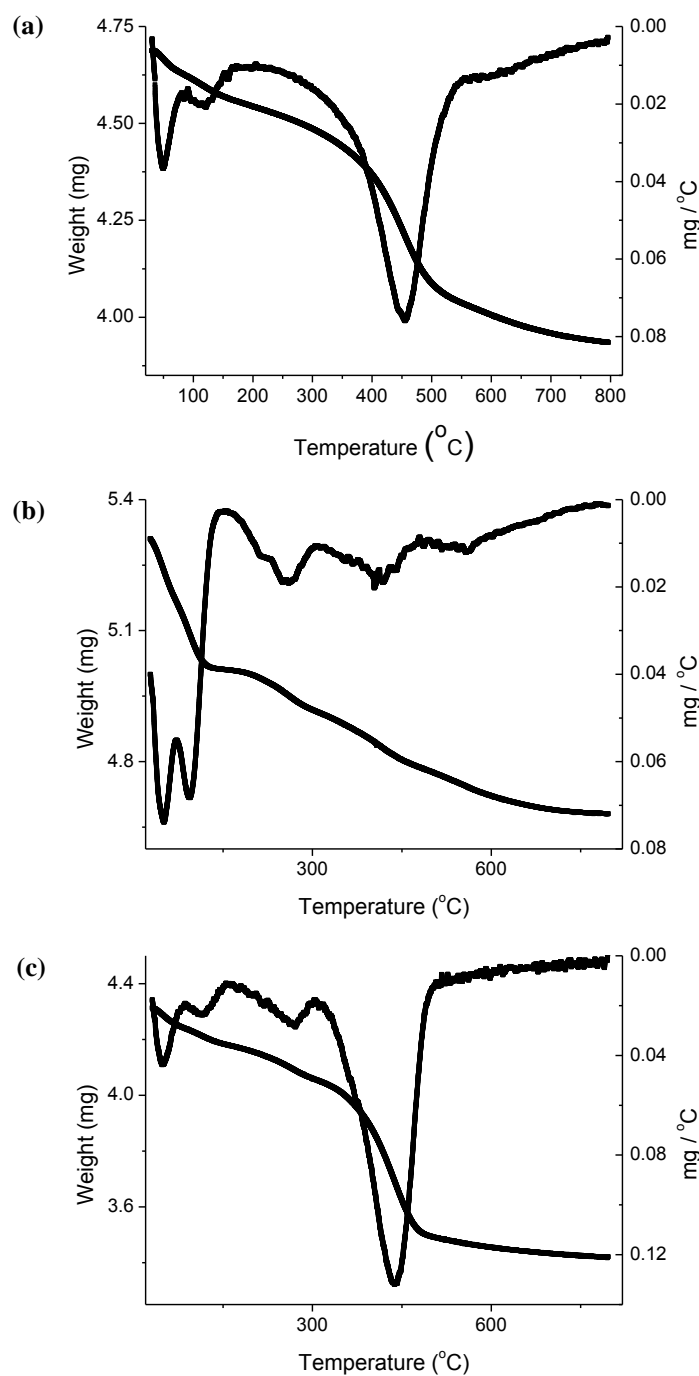

**Fig. S1** Thermo Gravimetric Analysis (TGA) and corresponding derivative curves of (a) MMS-C-IBU (b) MMS-X and (c) MMS-X-IBU.

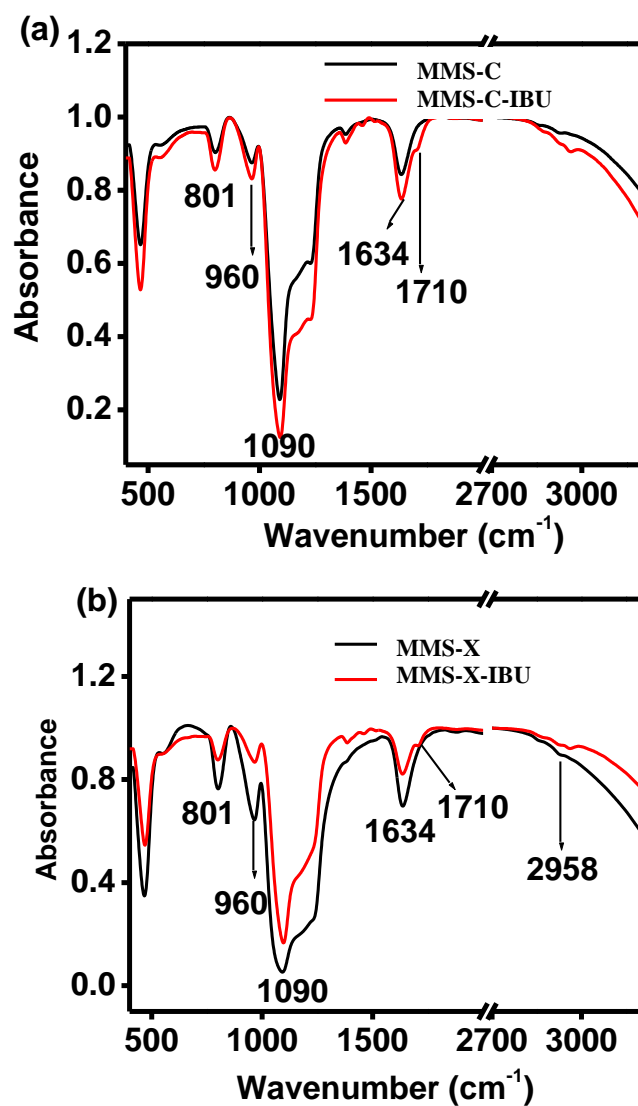

**Fig. S2** FT-IR spectra of (a) MMS-C and MMS-C-IBU; (b) MMS-X and MMS-X-IBU samples.

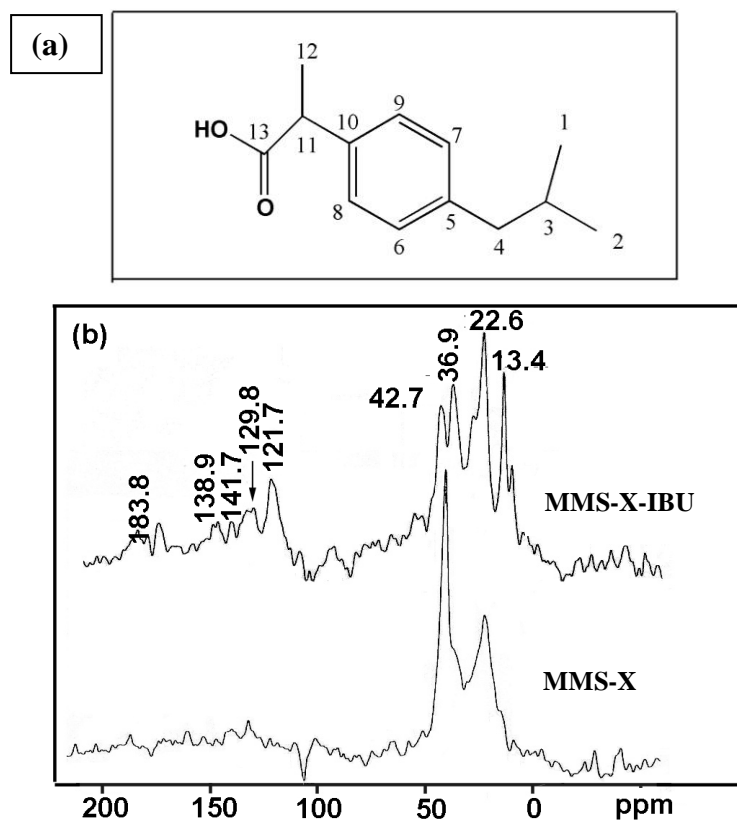

**Fig. S3** (a) Molecular structure of ibuprofen with atom labeling for the  $^{13}\text{C}$  NMR assignments;  $^{13}\text{C}$  MAS NMR spectra of (b) MMS-X-IBU and MMS-X samples. For MMS-X-IBU sample, the peaks from the amino  $\text{CH}_2$  of PAH overlap with the peaks from loaded Ibuprofen in the range 10-45 ppm.

**Table S1:** Line widths of  $^{13}\text{C}$  signals ( $\delta$  in ppm) in ibuprofen, MMS-C-IBU and MMS-X-IBU respectively.

| Carbon No.    | 1/2 <sup>a</sup> | 3    | 4 <sup>b</sup> | 5     | 6/7 <sup>a</sup> | 8/9 <sup>a</sup> | 10    | 11 <sup>b</sup> | 12          | 13    |
|---------------|------------------|------|----------------|-------|------------------|------------------|-------|-----------------|-------------|-------|
| Ibuprofen     | 23.4/<br>20.3    | 30.9 | 44.2           | 140.5 | 125.4/<br>127.5  | 129.2/<br>130.6  | 135.6 | 42.5            | 15.2        | 181.5 |
| MMS-C-<br>IBU | 21.2             | 30.3 | 45.3           | 141.8 | 129.7            | 127.4            | 137.9 | 45.2            | 17.5        | 179.9 |
| MMS-X-<br>IBU | 22.6<br>(d)      | 36.9 | 42.6<br>(d)    | 141.7 | 129.8            | 121.7            | 138.9 | 42.7<br>(d)     | 13.4<br>(d) | 183.8 |

<sup>a</sup>[C-1, C-2], [C-6, C-7] & [C-8, C-9] are equivalent carbon atoms (Figure 3b). <sup>b</sup>The signals from C-4 and C-11 overlap. <sup>(d)</sup>The signals from PAH overlap with that of ibuprofen in MMS-X-IBU.

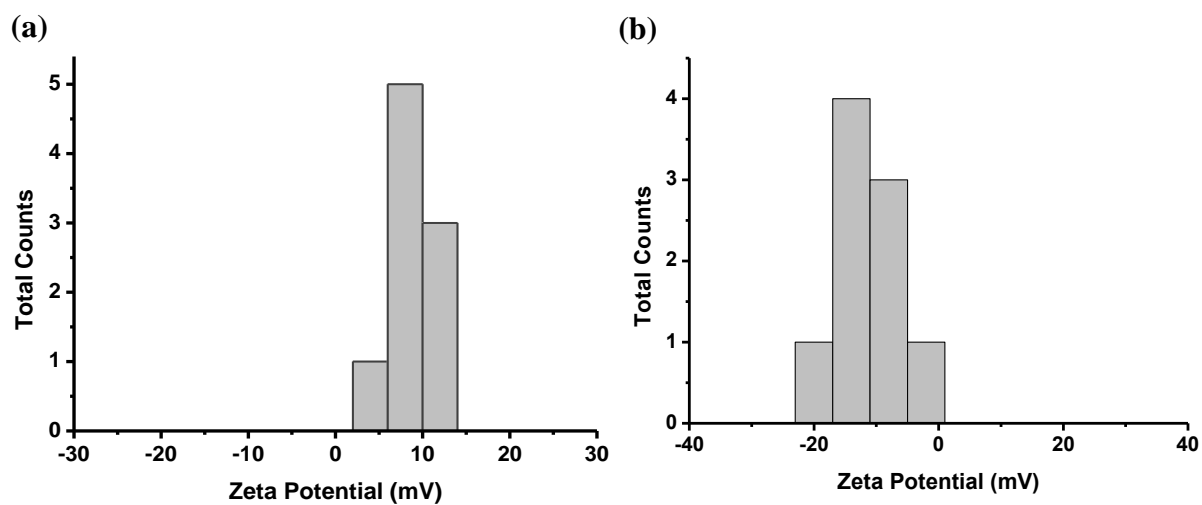

**Figure S4.** Zeta potential plot for (a) MMS-X and (b) MMS-C samples indicating the positive and negative surface charge, respectively.

**Table S2:** Textural properties of silica samples before and after loading with ibuprofen determined from N<sub>2</sub>- adsorption data.

| Sample    | S <sub>BET</sub> (m <sup>2</sup> /g) | D <sub>BJH</sub> (nm) | V <sub>p</sub> (mL/g) |
|-----------|--------------------------------------|-----------------------|-----------------------|
| MMS-C     | 717.67±5                             | 2.695±0.2             | 0.555±0.1             |
| MMS-X     | 579.78±8                             | 2.280±0.1             | 0.528±0.1             |
| MMS-C-IBU | 104.73±5                             | 2.318±0.2             | 0.126±0.04            |
| MMS-X-IBU | 87.32±3                              | 1.417±0.4             | 0.114±0.05            |
